# Supplementary material for: Impacts of COVID-19 on Mental Health Safety Net Services for Youths: A National Survey of Agency Officials
Source: Atypon-hosted journal article supplement (doi:10.1176/appi.ps.202100176), 2021-07-29
Supplement: appi.ps.202100176.ds001.pdf [file appi.ps.202100176.ds001.pdf]

## APPENDIX A

### States from which County-Level Mental Health Agency Policymakers were Recruited

| U.S. Census Region | States             |
|--------------------|--------------------|
| West               | CA, OR, UT, WA     |
| Midwest            | IA, MN, NE, OH, WI |
| South              | FL, NC, TX         |
| Northeast          | CT, NY, PA         |

## APPENDIX B

### Survey Instrument

*First, we would like your responses to some broad questions about the extent to which you think that issues important for children's mental health have been impacted by the COVID-19 pandemic.*

To what extent do you think that the COVID-19 pandemic has **prevented youth and their families in your state from receiving needed mental health services**? (Please slide the bar to select the number) 1= No effect, 7= Completely preventing

1 2 3 4 4 5 6 7

1= No effect ()

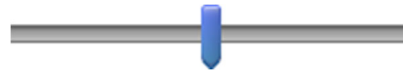

To what extent do you think that the COVID-19 pandemic has **negatively impacted the quality of mental health services** provided to youth and their families in your state? (Please slide the bar to select the number) 1= No impact, 7= Major negative impact on quality

1 2 3 4 4 5 6 7

1= No effect ()

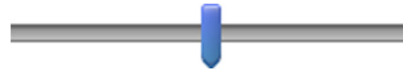

To what extent do you think that the COVID-19 pandemic has **increased the demand for mental health services** among youth and their families in your state? (Please slide the bar to select the number) 1= No effect, 7= Major increase in demand

1 2 3 4 4 5 6 7

1= No effect ( )

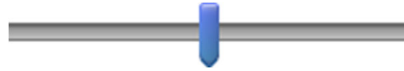

Q62 To what extent do you think that the COVID-19 pandemic has **reduced the supply of mental health services** for youth and their families in your state? 1= No effect, 7= Major reduction in supply (Please slide the bar to select the number)

1 2 3 4 4 5 6 7

1= No effect ( )

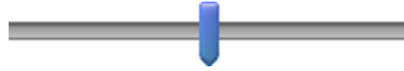

Q64 To what extent do you think that the COVID-19 pandemic has **had negative impacts on the mental health** of youth and their families in your state? (Please slide the bar to select the number) 1= No effect, 7= Major negative impact on mental health

1 2 3 4 4 5 6 7

1= No effect ( )

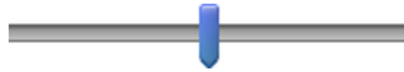

Q65 To what extent do you think that the COVID-19 pandemic has had **disproportionately negative impacts on the mental health of socially disadvantaged** youth and their families in your state. (Please slide the bar to select the number) 1= Equal impact, 7= socially disadvantaged youth/families much more negatively impacted

1 2 3 4 4 5 6 7

1= Equal impact ( )

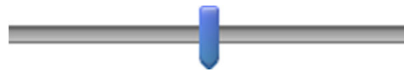

Q5 Below is a list of **challenges** your agency might have faced in providing mental health services to youth and their families during the COVID-19 pandemic. Please select the number that represents the extent to which you think each issue has been a challenge.

|                                                                                                                                    | 1 (Not a challenge)   | 2                     | 3                     | 4                     | 5                     | 6                     | 7 (Major challenge)   |
|------------------------------------------------------------------------------------------------------------------------------------|-----------------------|-----------------------|-----------------------|-----------------------|-----------------------|-----------------------|-----------------------|
| Provider capacity/staffing issues because of illness and /or childcare obligations                                                 | <input type="radio"/> |
| Lack of personal protective equipment for providers                                                                                | <input type="radio"/> |
| Patients missing appointments                                                                                                      | <input type="radio"/> |
| Facility closures                                                                                                                  | <input type="radio"/> |
| Redeployment of inpatient psychiatric beds for anticipated/actual COVID-19 patients                                                | <input type="radio"/> |
| Medication supply                                                                                                                  | <input type="radio"/> |
| Inability to provide some services remotely (e.g., home-based and community-based programs, mobile crisis, respite for caregivers) | <input type="radio"/> |

*Next are a few questions about challenges your agency might have faced in providing **tele-mental health services** to youth and their families during the COVID-19 pandemic.*

Below is a list of **provider-related** challenges your agency might have faced in providing **tele-mental health services** to youth and their families during the COVID-19 pandemic. On a scale of 1-7, please indicate the extent to which you think each issue has been a challenge.

|                                                                         | 1 (Not a challenge)   | 2                     | 3                     | 4                     | 5                     | 6                     | 7 (Major challenge)   |
|-------------------------------------------------------------------------|-----------------------|-----------------------|-----------------------|-----------------------|-----------------------|-----------------------|-----------------------|
| Access to a HIPPA adherent platform to practice tele-mental health      | <input type="radio"/> |
| Lack of remote work policies for providers                              | <input type="radio"/> |
| Lack of provider training on tele-mental health                         | <input type="radio"/> |
| Licensing challenges                                                    | <input type="radio"/> |
| Types of therapies offered do not translate to tele-mental health       | <input type="radio"/> |
| Providers not comfortable with tele-mental health                       | <input type="radio"/> |
| Regulations regarding billing (e.g., unable to bill for text messaging) | <input type="radio"/> |
| Regulations do not permit flexible delivery of the service              | <input type="radio"/> |



Below is a list of **patient-related** challenges your agency might have faced in providing **tele-mental health services** to youth and their families during the COVID-19 pandemic. On a scale of 1-7, please indicate the extent to which you think each issue has been a challenge.

|                                                                                                              | 1 (Not a challenge)   | 2                     | 3                     | 4                     | 5                     | 6                     | 7 (Major challenge)   |
|--------------------------------------------------------------------------------------------------------------|-----------------------|-----------------------|-----------------------|-----------------------|-----------------------|-----------------------|-----------------------|
| Lack of reliable internet access, data on cellphone plans, or equipment (i.e., laptops, iPads, smartphones)  | <input type="radio"/> |
| Youth or families not comfortable with tele-mental health                                                    | <input type="radio"/> |
| Youth or families not aware of the option for tele-mental health                                             | <input type="radio"/> |
| Youth or families concerned about privacy issues                                                             | <input type="radio"/> |
| Telehealth services not developmentally appropriate for some youth (e.g., age of child; child is non-verbal) | <input type="radio"/> |

Below is a list of **financing-related** challenges your agency might have faced in providing **tele-mental health services** to youth and their families during the COVID-19 pandemic. On a scale of 1-7, please indicate the extent to which you think each issue has been a challenge.

|                                                                                        | 1 (Not a challenge)   | 2                     | 3                     | 4                     | 5                     | 6                     | 7 (Major challenge)   |
|----------------------------------------------------------------------------------------|-----------------------|-----------------------|-----------------------|-----------------------|-----------------------|-----------------------|-----------------------|
| Lack of/insufficient Medicaid reimbursement for tele-mental health                     | <input type="radio"/> |
| Lack of/insufficient CHIP reimbursement for tele-mental health                         | <input type="radio"/> |
| Lack of/insufficient private/commercial insurance reimbursement for tele-mental health | <input type="radio"/> |
| Limited number of tele-mental health services for which reimbursement is provided      | <input type="radio"/> |

---

Page Break

---
